# Supplementary material
Source: ML conference proceedings conference paper supplement (https://proceedings.neurips.cc/paper_files/paper/2020/hash/b837305e43f7e535a1506fc263eee3ed-Abstract.html)
Supplement: Supplementary file [file b837305e43f7e535a1506fc263eee3ed-Supplemental.zip]

## Motivation

### Functional alignment in a single-site fMRI dataset

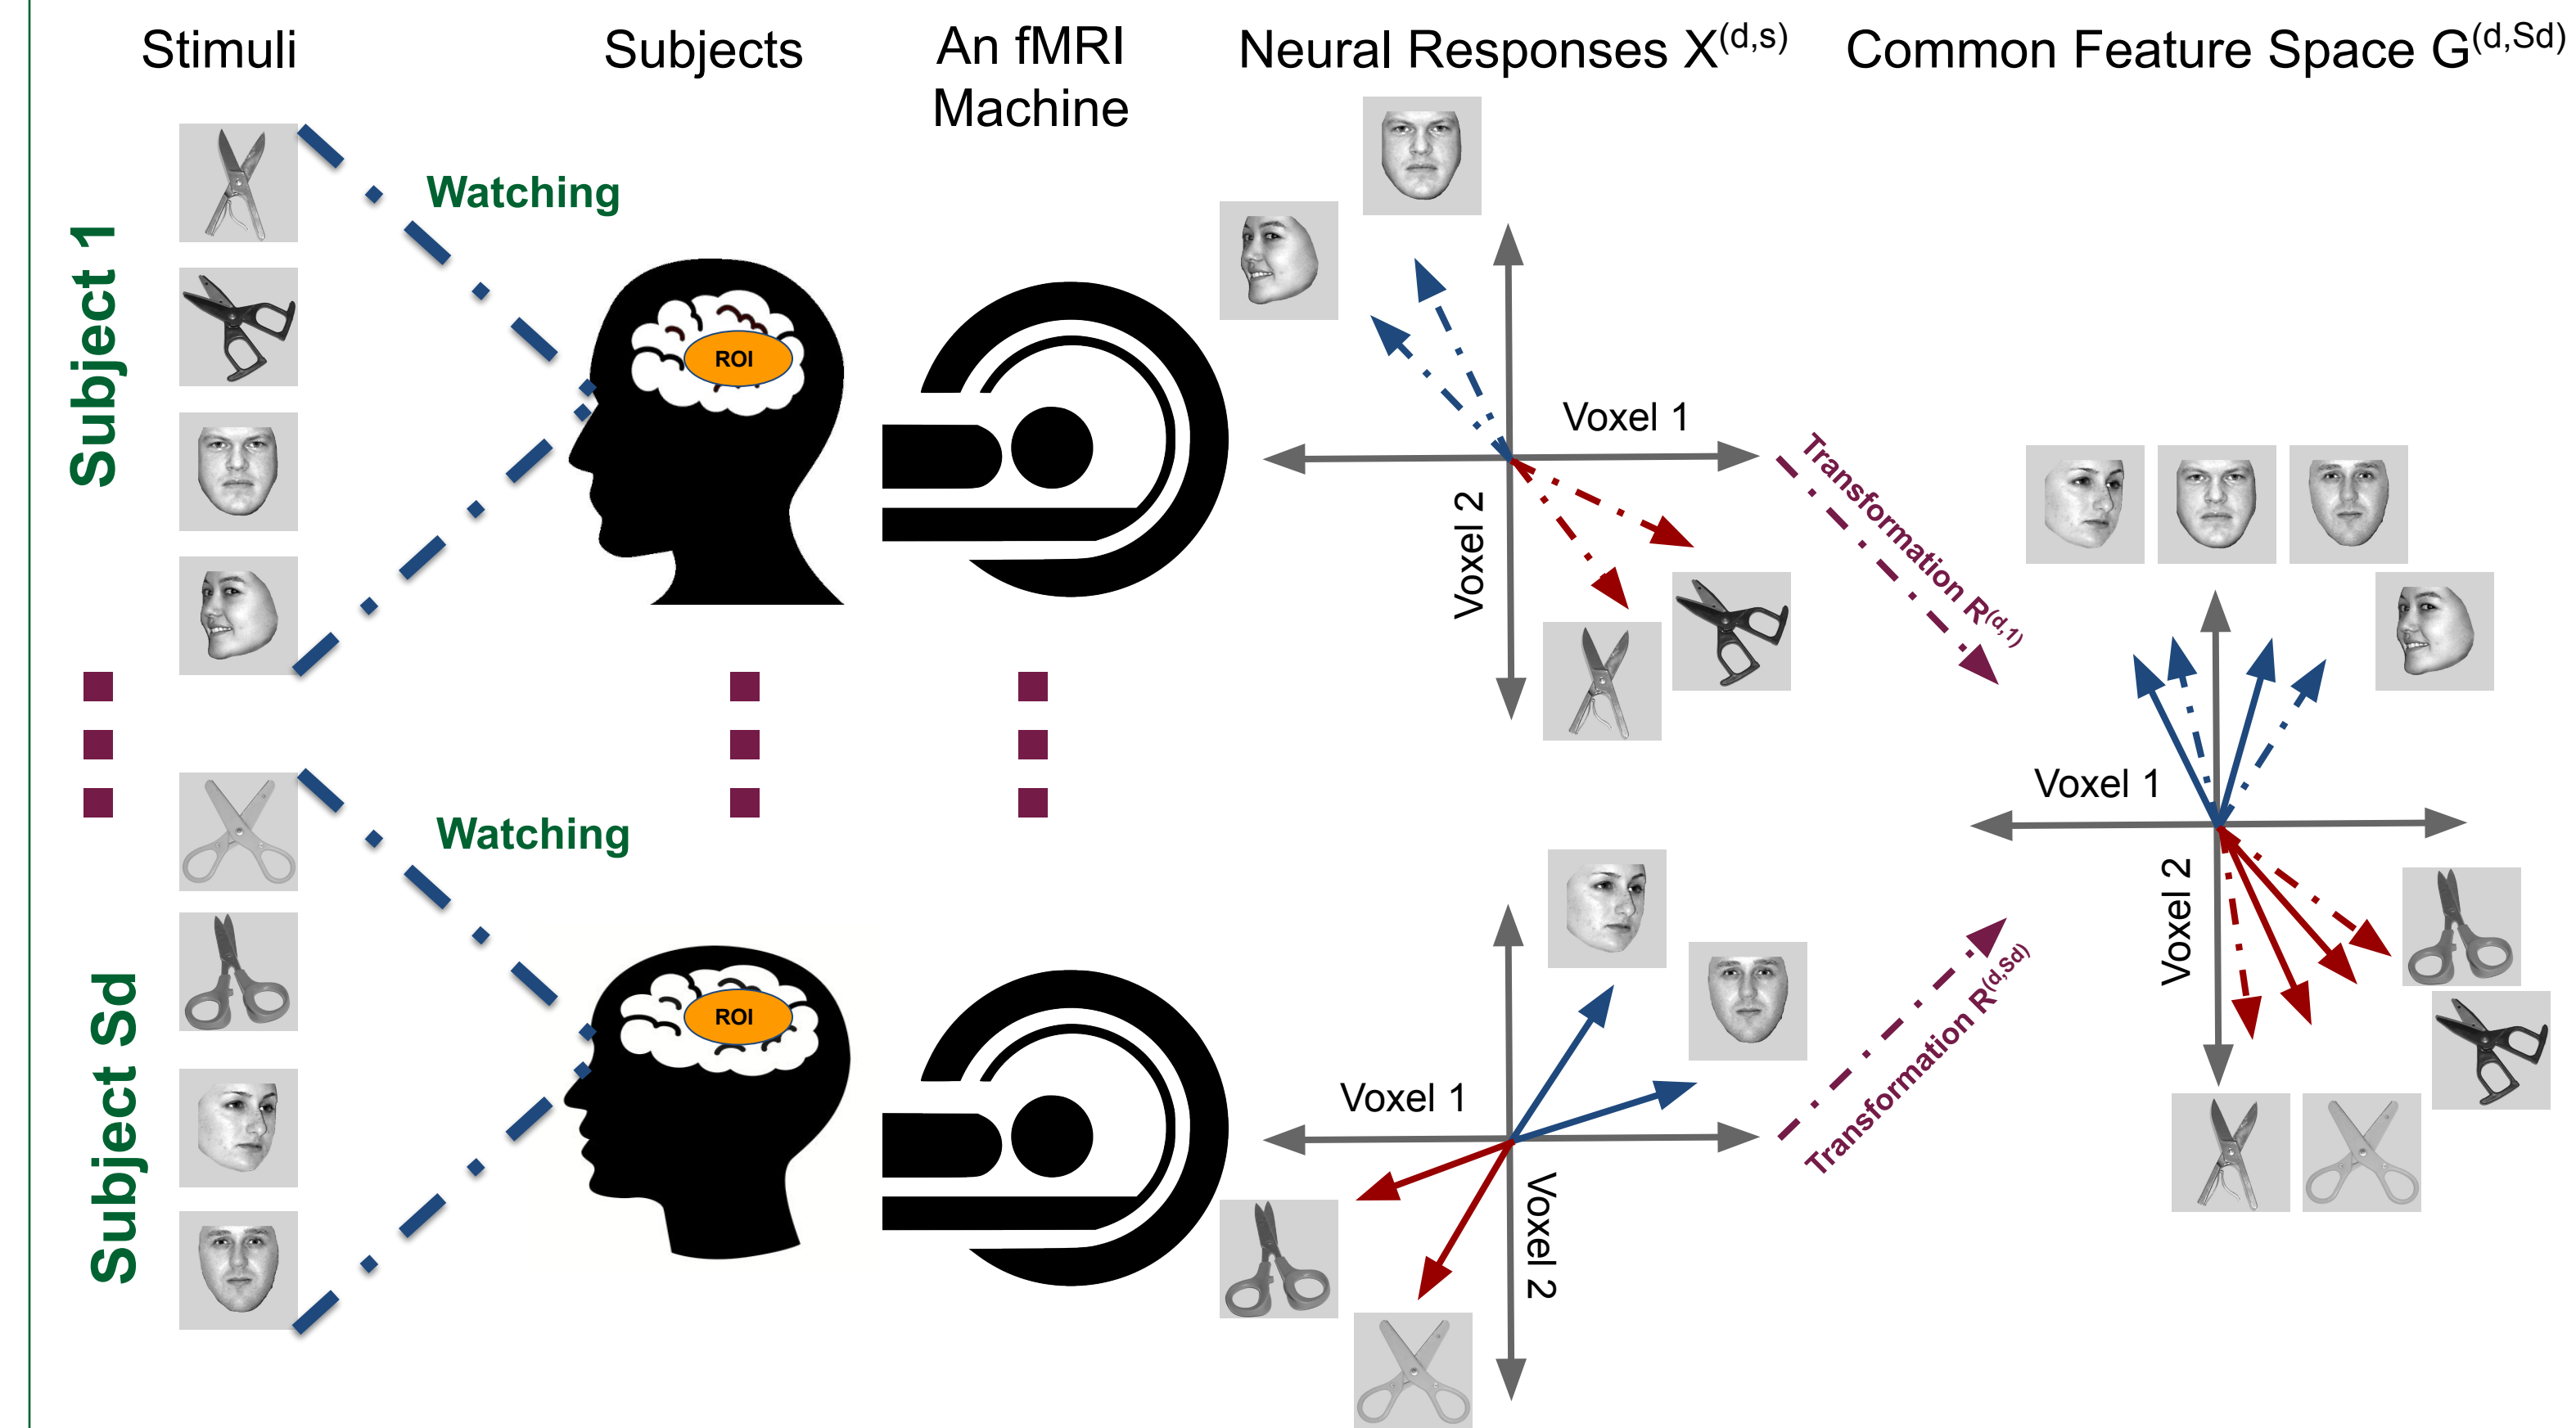

### Task-based functional magnetic resonance imaging (fMRI):

- o a prevalent tool in neuroscience to analyze how human brains work.

### Challenging issues in most fMRI studies:

- o **High-dimensionality** and noisy
- o **Expensive** to collect with **small sample sizes**
- o **Batch effects**: a set of external elements that may affect the performance of analysis

## SSTL: Objective Functions

### STEP 1: Generating the common space for each site:

$$\mathcal{J}_C^{(d)} \left( [\mathbf{X}^{(d,s)}]_{s=1 \dots S_d} \right) = \arg \min_{\mathbf{R}^{(d,s)}, \mathbf{G}^{(d,S_d)}} \sum_{s=1}^{S_d} \left\| \mathbf{G}^{(d,S_d)} - \mathbf{X}^{(d,s)} \mathbf{R}^{(d,s)} \right\|_F^2,$$

$$\text{subject to } \left( \mathbf{G}^{(d,S_d)} \right)^T \mathbf{G}^{(d,S_d)} = \mathbf{I}_k.$$

- o  $\mathbf{X}^{(d,s)}$  denotes the **neural responses** for  $s$ -th subject in  $d$ -th site
- o  $\mathbf{R}^{(d,s)}$  denotes the **mapping matrices** for  $s$ -th subject in  $d$ -th site
- o  $\mathbf{G}^{(d,S_d)}$  denotes the **common space** for  $d$ -th site

### STEP 2: Generating the global shared space

$$\mathcal{J}_G(\mathbf{G}) = \arg \min_{\mathbf{W}} \left\| \mathbf{G} - \mathbf{G} \mathbf{W} \mathbf{W}^T \right\|_F^2,$$

$$\text{subject to } \mathbf{W}^T \mathbf{W} = \mathbf{I}_k.$$

- o  $\mathbf{G}$  denotes the concatenated version of **all common spaces in the training set**
- o  $\mathbf{W}$  is the **global shared space**

## Datasets

| ID | Title (Open NEURO ID)                              | Type     | $S_d$ | #1 | $T_d$ | #2   | #3      |
|----|----------------------------------------------------|----------|-------|----|-------|------|---------|
| A  | Stop signal with spoken pseudo word naming (DS007) | Decision | 20    | 4  | 149   | B, C | B, C, D |
| B  | Stop signal with spoken letter naming (DS007)      | Decision | 20    | 4  | 112   | A, C | A, C, D |
| C  | Stop signal with manual response (DS007)           | Decision | 20    | 4  | 211   | A, B | A, B, D |
| D  | Conditional stop signal (DS008)                    | Decision | 13    | 4  | 317   |      | A, B, C |
| E  | Simon task (DS101)                                 | Simon    | 21    | 2  | 302   |      | F       |
| F  | Flanker task (DS102)                               | Flanker  | 26    | 2  | 292   |      | E       |
| G  | Integration of sweet taste – study 1 (DS229)       | Flavour  | 15    | 6  | 580   | H    | H       |
| H  | Integration of sweet taste – study 3 (DS231)       | Flavour  | 9     | 6  | 650   | G    | G       |

$S_d$  is the number of subject; #1 is the number of stimulus categories;  $T_d$  is the number of time points per subjects; #2 lists the other datasets that overlap with this dataset; #3 lists the other datasets whose neural responses can be transferred to this dataset.

## Multi-site classification analysis for sets of datasets that do not overlap

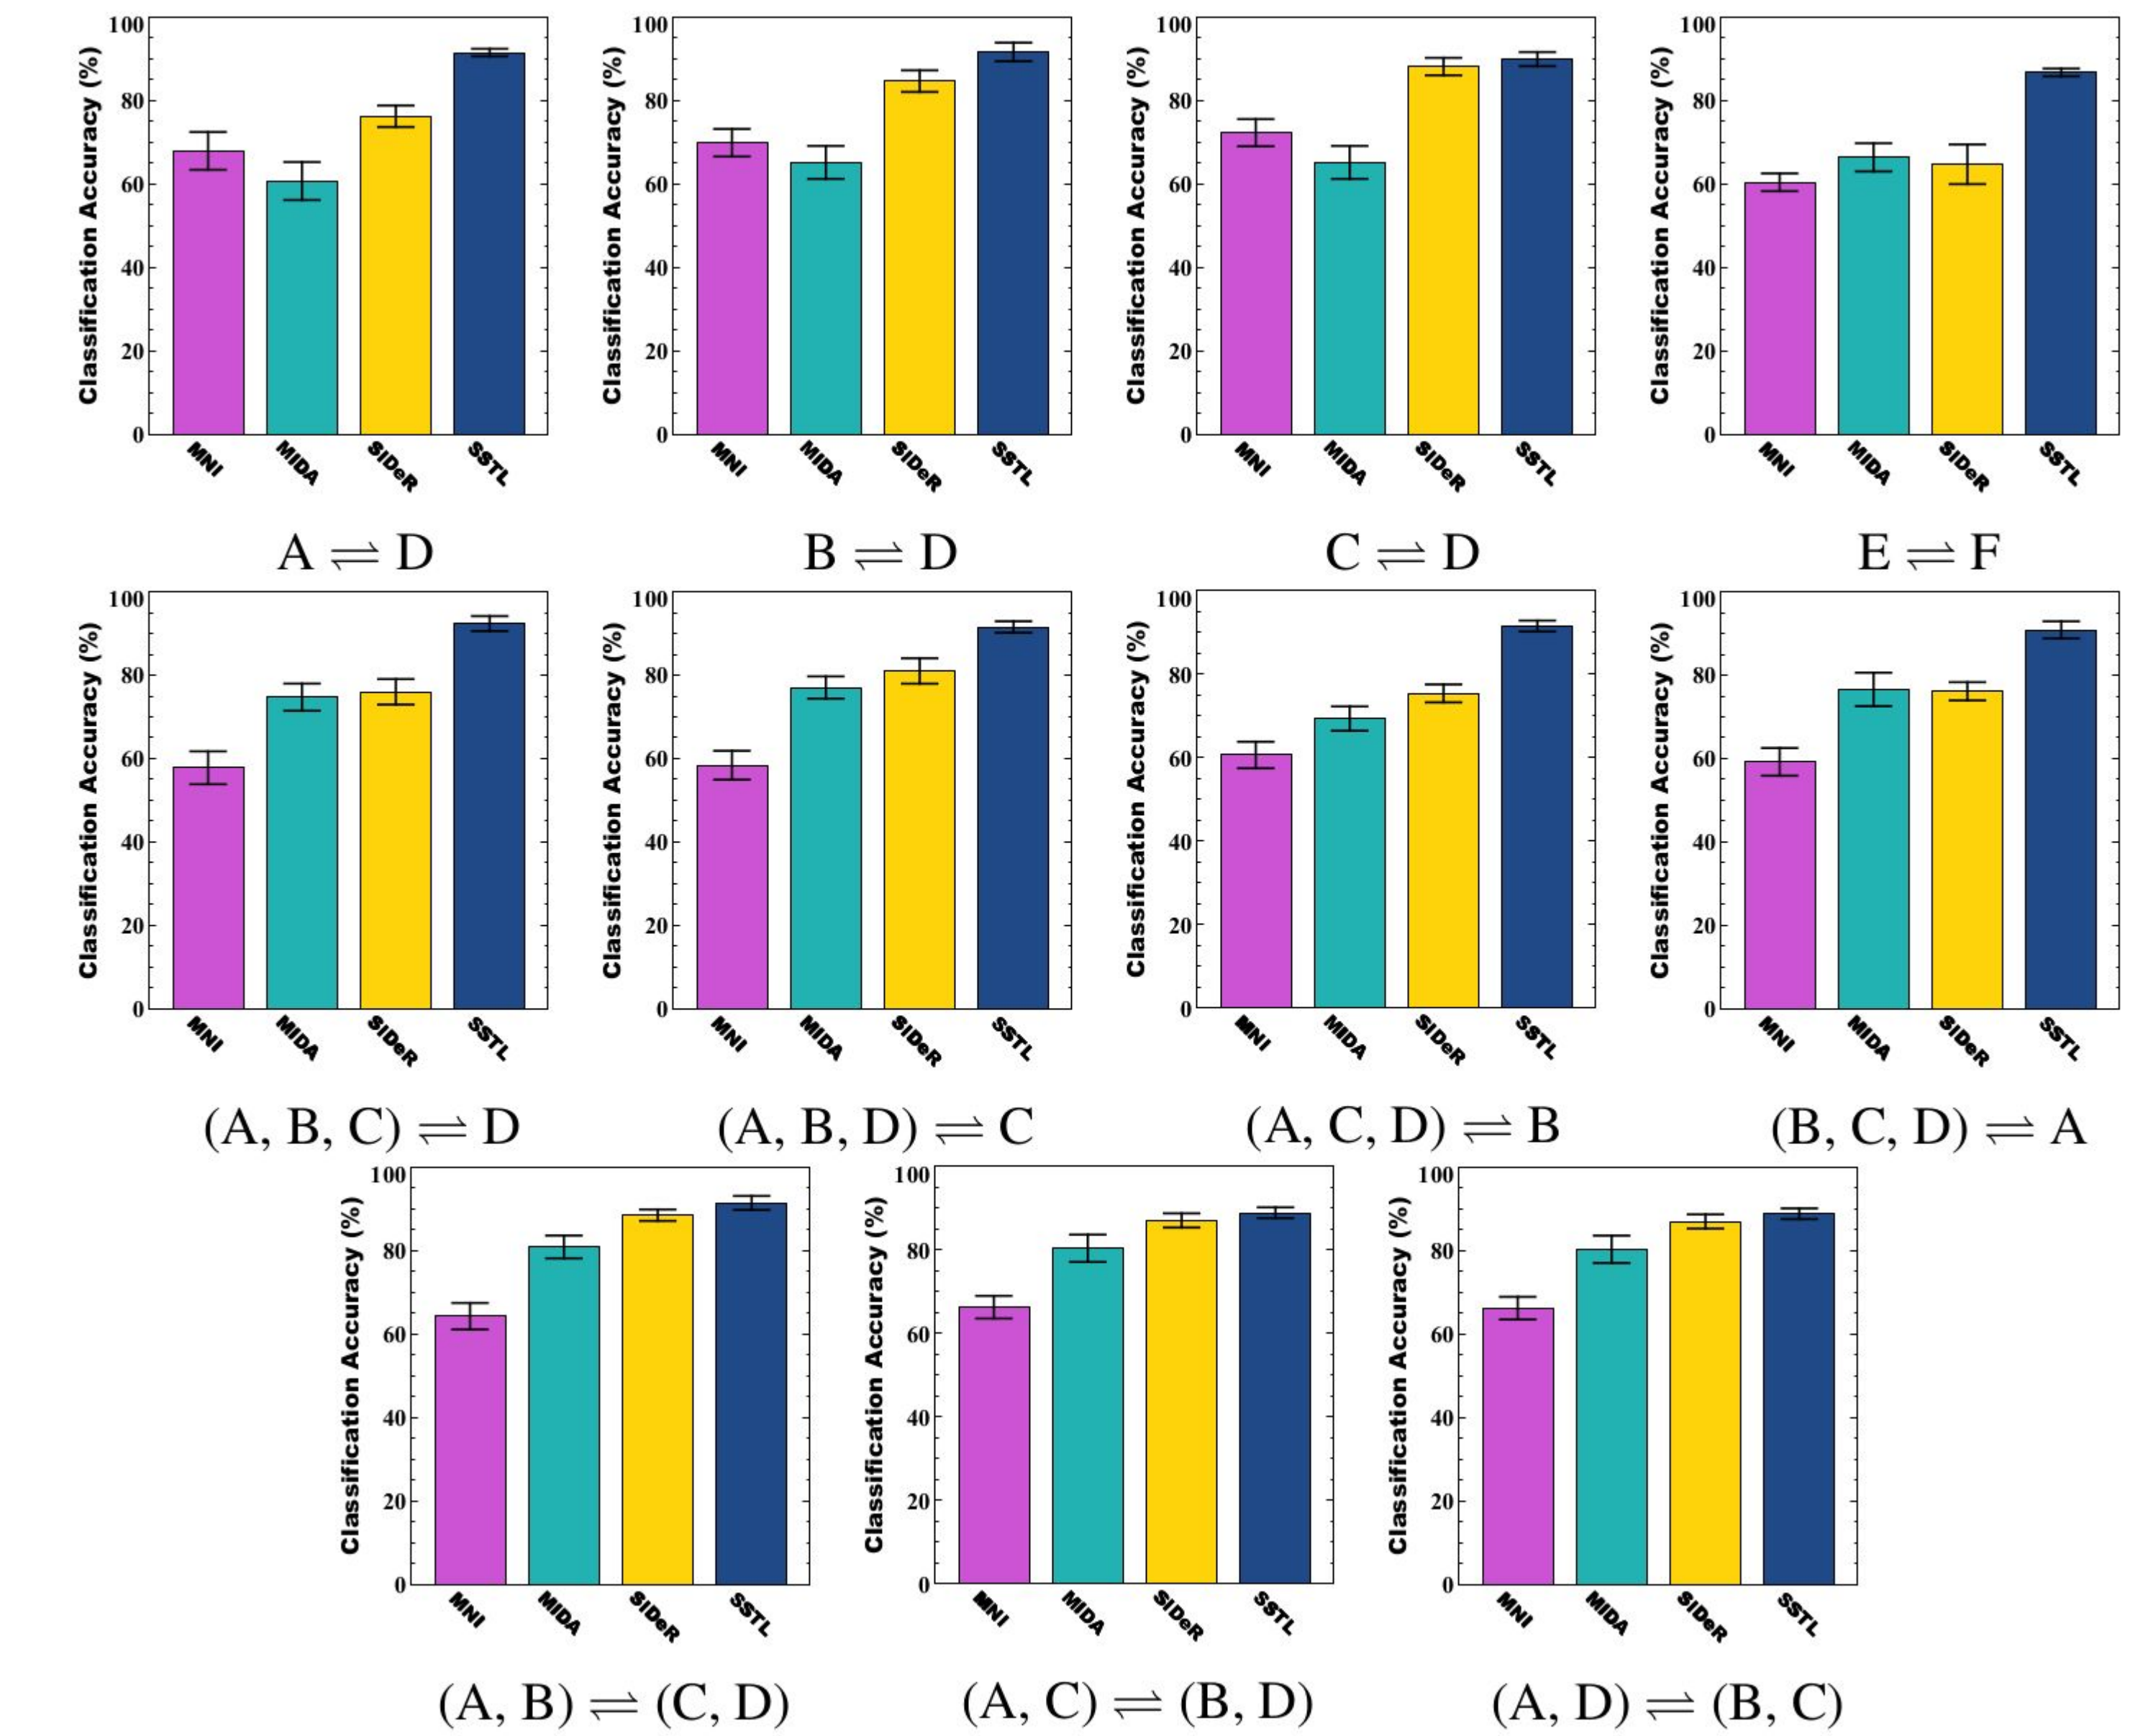

Multi-site classification analysis for datasets that have no overlap (i.e., do not share any subjects). Error bars illustrate  $\pm 1$  standard deviation.

## Shared Space Transfer Learning (SSTL)

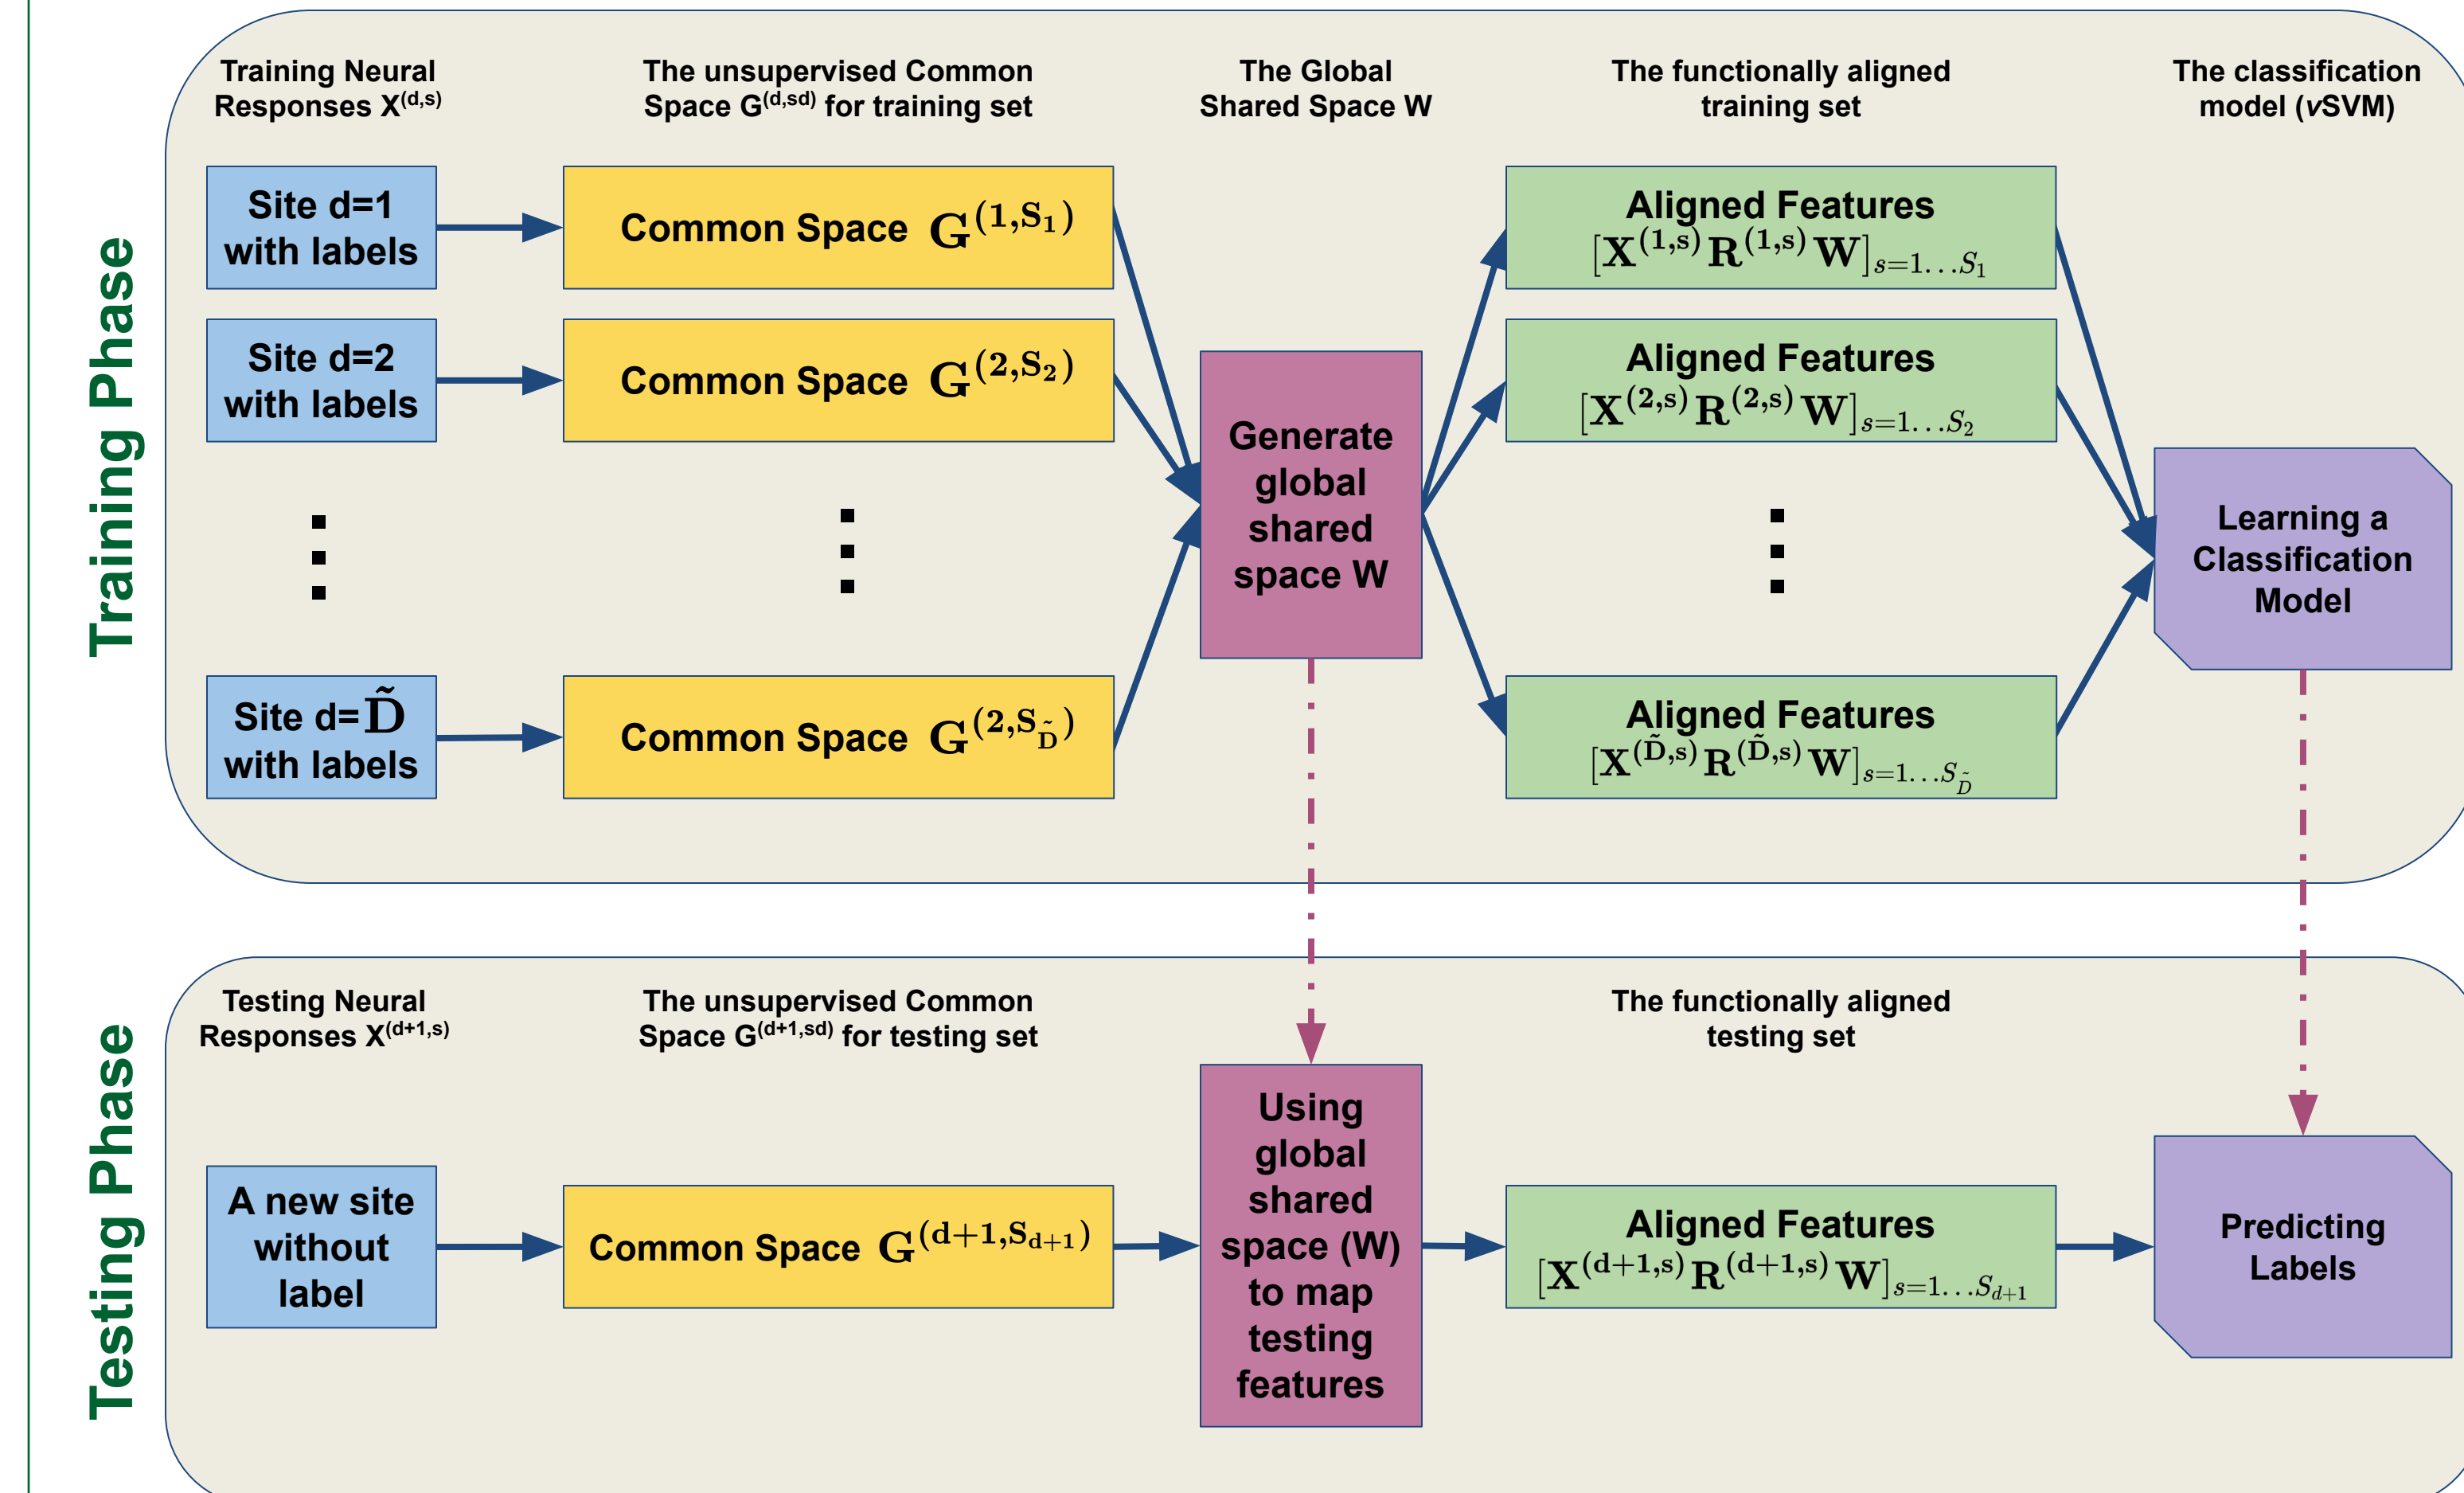

### The proposed Shared Space Transfer Learning (SSTL):

- o A novel **Transfer Learning (TL)** approach for **multi-site fMRI analysis**
- o It can **functionally align homogeneous** multi-site fMRI datasets
- o It **IS NOT LIMITED** to *overlapped datasets* (i.e., share some subjects)
- o It can improve the **prediction performance** in every site.

### SSTL learns a TL model by using a hierarchical two-step procedure:

- o STEP 1: Extracting a set of **site-specific common features** for each site.
- o STEP 2: Transferring the **common features** to a **site-independent, global, shared space**.

### SSTL uses a single-iteration optimization approach

## Multi-site classification analysis for pairs of datasets that overlap

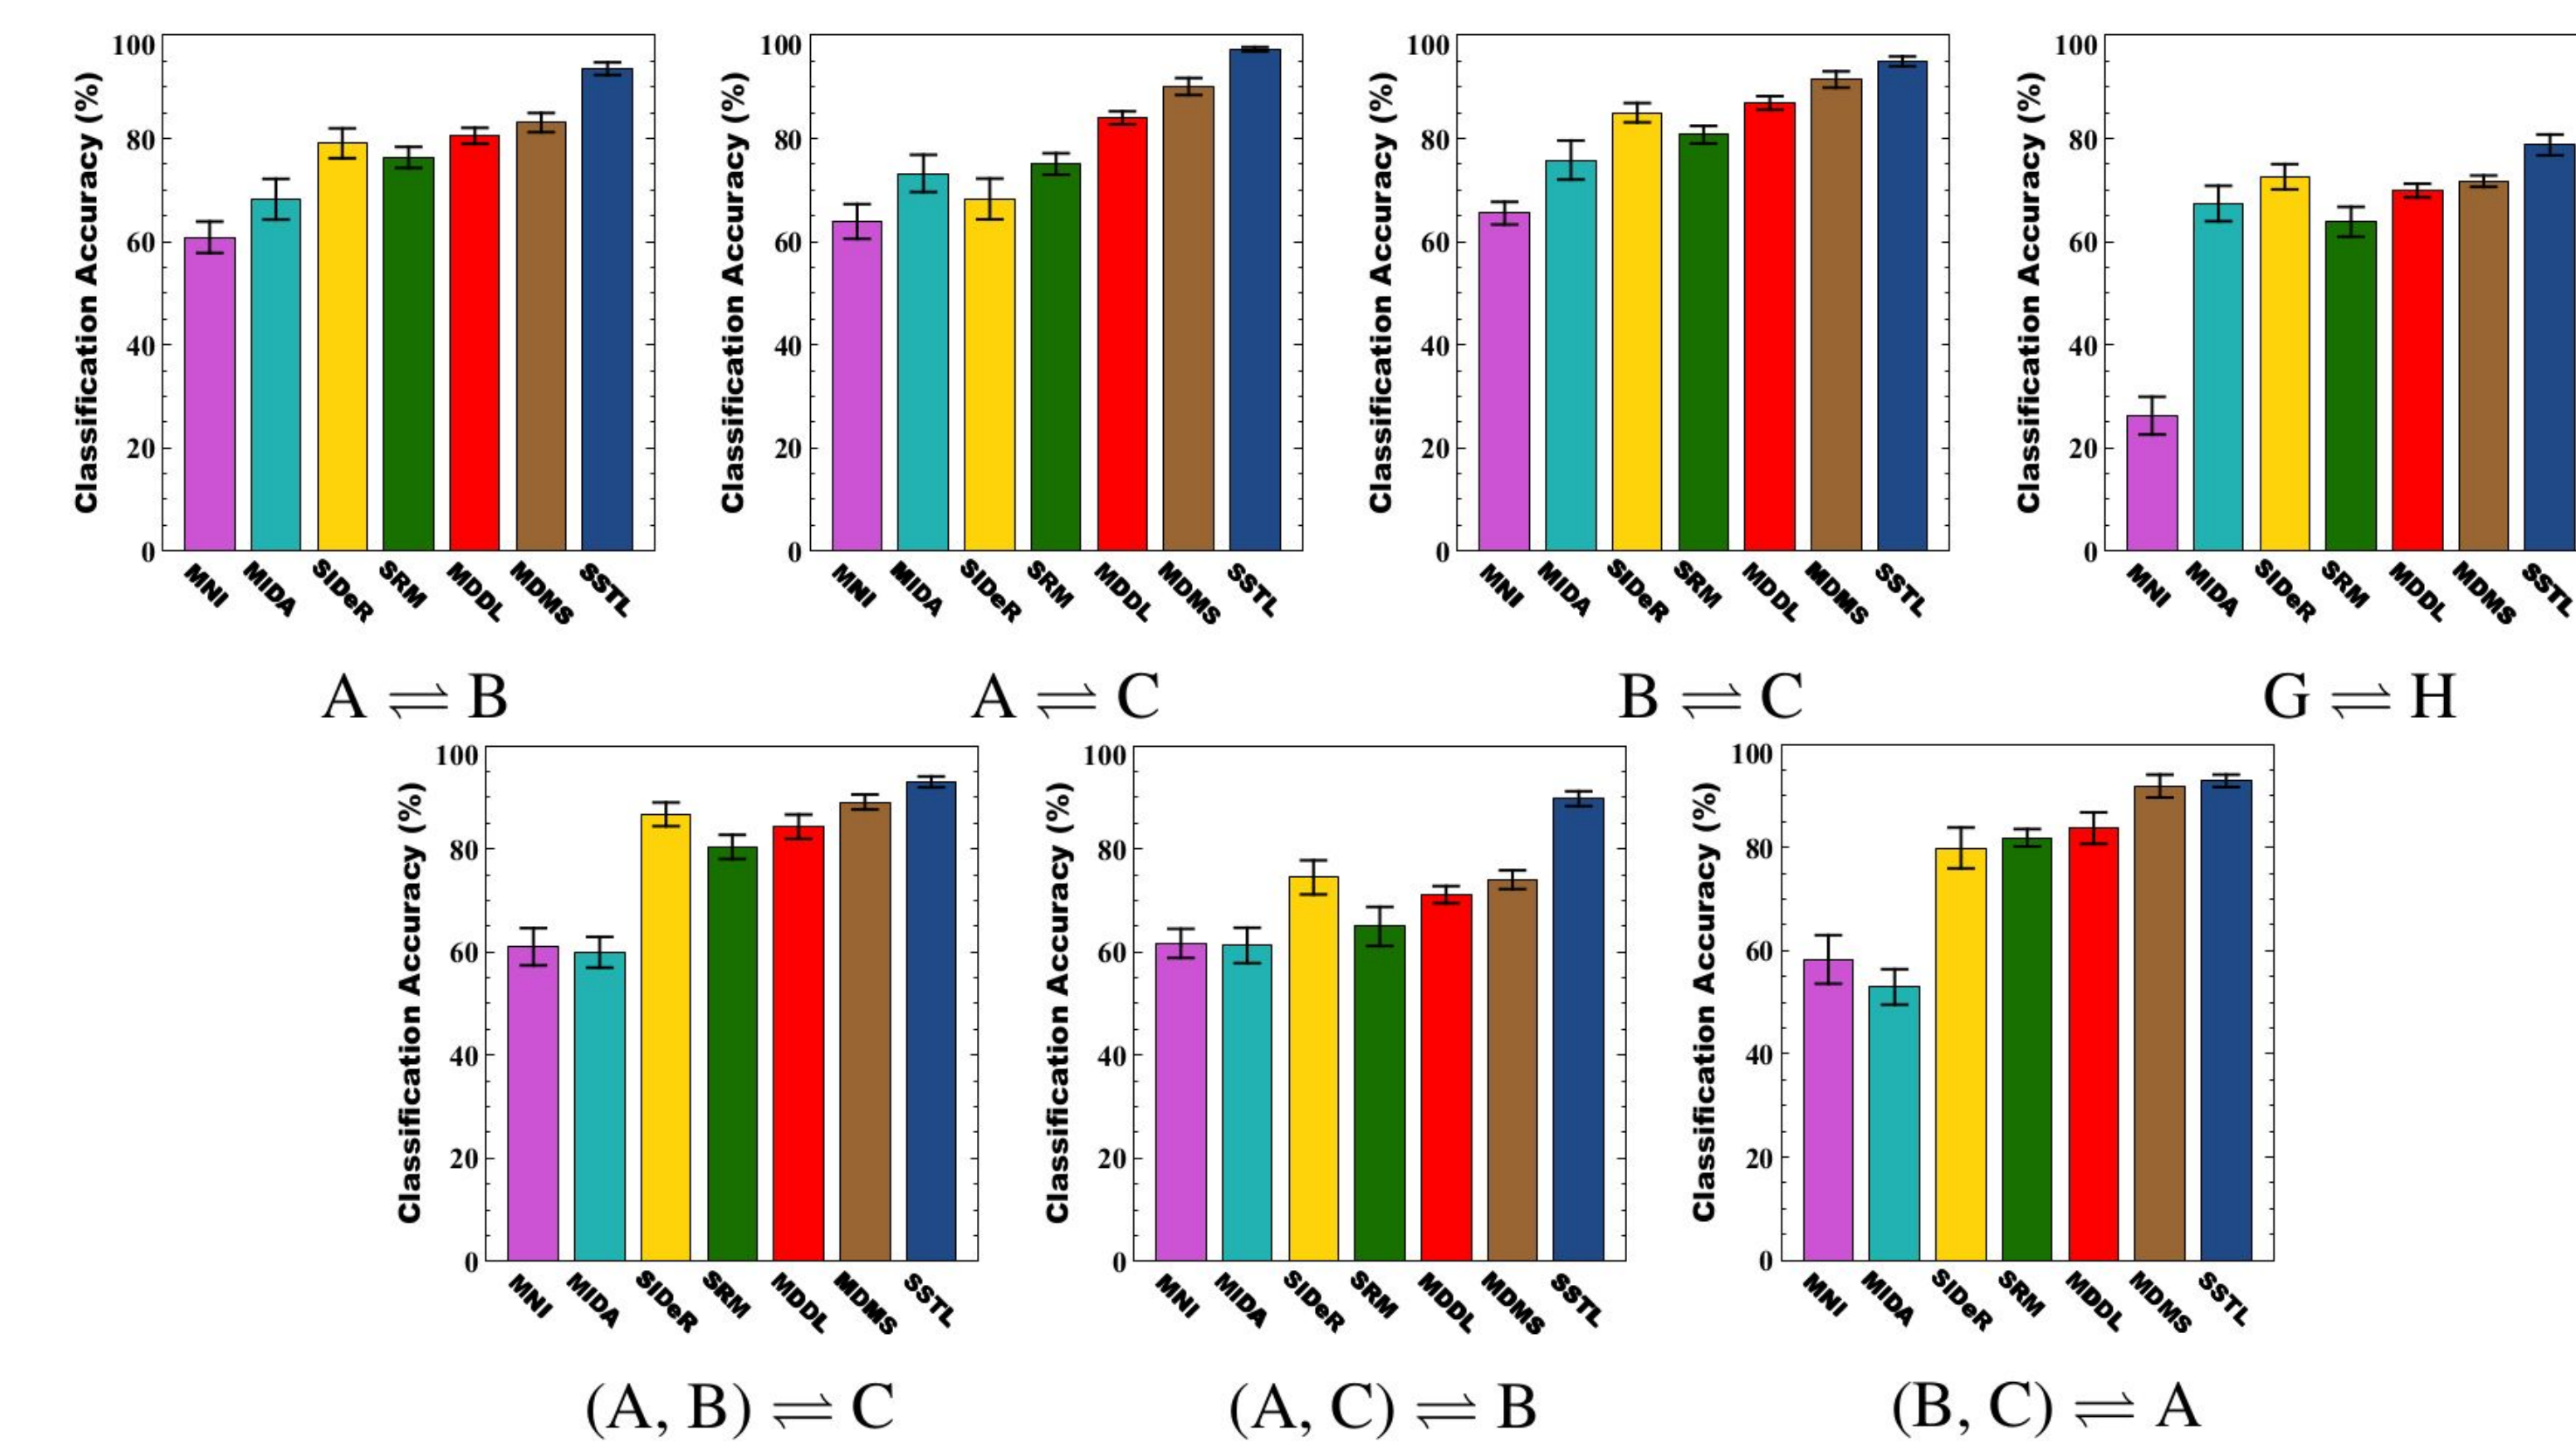

Multi-site classification analysis for datasets that overlap (i.e., share some subjects). Error bars illustrate  $\pm 1$  standard deviation.

### We compare SSTL with 6 different existing methods:

- o Raw neural responses in **MNI space** without using TL methods
- o Shared response model (**SRM**)
- o Maximum independence domain adaptation (**MIDA**)
- o Side Information Dependence Regularization (**SIDeR**)
- o Multi-dataset dictionary learning (**MDDL**)
- o Multi-dataset multi-subject (**MDMS**)

## Visualizing transferred neural responses

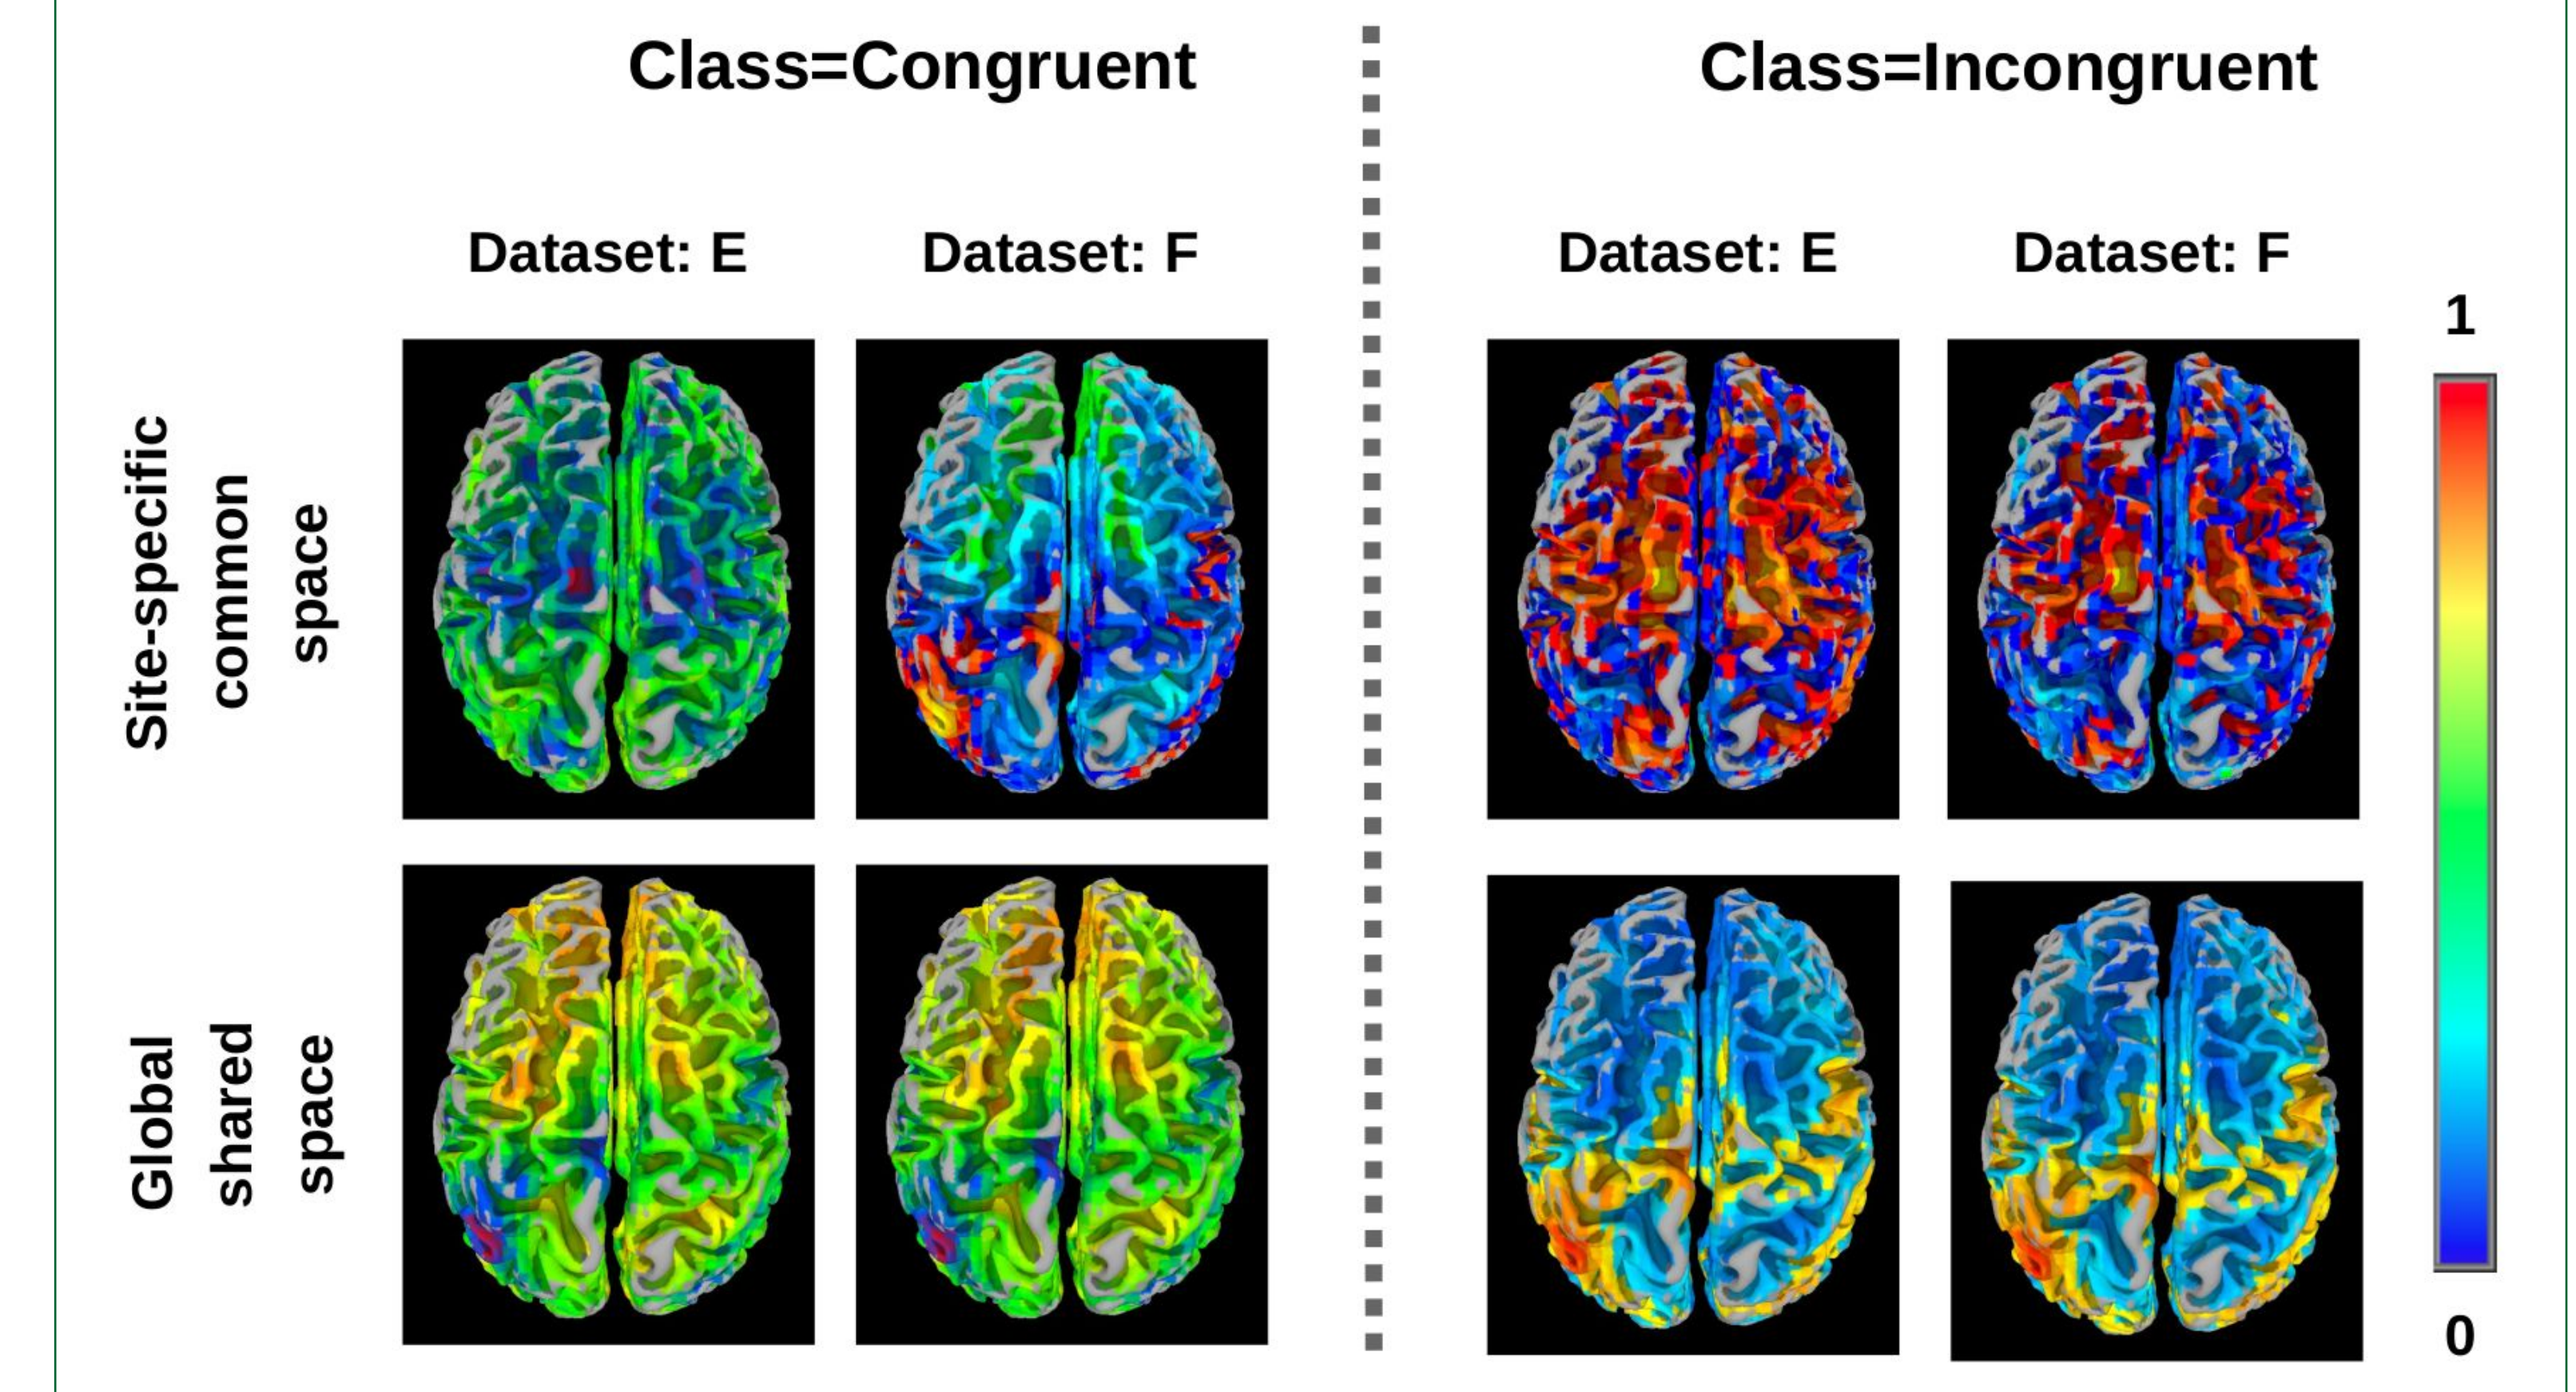

## Conclusion

In this paper, we propose the *Shared Space Transfer Learning (SSTL)* as a novel transfer learning (TL) technique that can be used for homogeneous multi-site fMRI analysis. Our comprehensive experiments confirmed that SSTL achieves superior performance to other state-of-the-art TL analysis methods. We anticipate that SSTL's multi-view technique for transfer learning will have strong practical applications in neuroscience — such as functional alignment of multi-site fMRI data, perhaps of movie stimuli.
